# Supplementary material
Source: PubMed Central journal article supplement (PMC9934822)

Lam SK, Winter J, Genderen KV, Lauden SM, Windsor W, Umphrey L. When global becomes virtual: a survey of virtual global health education activities during the COVID-19 pandemic among pediatric educators. *J Grad Med Educ.* 2023;15(1):105-111. DOI: <http://dx.doi.org/10.4300/JGME-D-22-00259.1>

## Supplementary Data

### Virtual Global Health Education Activities (VGHEA) Survey Study

#### Specific Project Objectives:

1. To describe characteristics of current global health education (GHE) programming
2. To describe global health education activities (GHEA): both in-person and virtual, and both before and after the COVID-19 pandemic began
3. To describe ongoing, new and/or planned **virtual** global health education activities (VGHEAs) since the COVID-19 pandemic began
4. To determine preferred VGHEAs during the COVID-19 pandemic in the next 6 months
5. To evaluate trainee and supervisor experience with and preferences for VGHEAs
6. To determine perceived benefits and barriers/challenges of VGHEAs
7. To identify geographic differences in preferred VGHEAs

#### Acronyms

GH = global health

GHE = global health education

GHEA = global health education activity

VGHE = virtual global health education

VGHEA = virtual global health education activity

VTC = virtual teleconference

#### Consent questions:

- Are you > 18 years old? Yes/No (STOP survey if NO)
- Do you give your consent to participate in the following survey? Yes/No (STOP survey if NO)

\*\*\* Instructions: Please fill out the survey for your global health program. For the purposes of this survey, a *Global Health Education Activity (GHEA)* is defined as any clinical health sciences curricula and/or experiential learning focused on social accountability and rooted in the concepts of equity, cultural sensitivity, and collaborative, interdisciplinary practice of patient and population-centered healthcare. Activities may be clinical, public health, research, community, educational and/or development focused, and they will seek to bridge geographical distance and/or resource levels.

#### **Part A. Characteristics of global health education (GHE) at your institution**

**OBJECTIVE 1:** To describe characteristics of current global health education (GHE) programming

1. Date of assessment

Lam SK, Winter J, Genderen KV, Lauden SM, Windsor W, Umphrey L. When global becomes virtual: a survey of virtual global health education activities during the COVID-19 pandemic among pediatric educators. *J Grad Med Educ.* 2023;15(1):105-111. DOI: <http://dx.doi.org/10.4300/JGME-D-22-00259.1>

2. What is your institution (free text)
3. In which country is your institution or organization located, e.g. where do you primarily work? (drop down menu)
4. If your site is part of a larger organization, in which country is the headquarters or primary location of your organization located?
  - a. N/A
  - b. Drop down menu (country list)
5. **What is your current position within your institution or organization?** (*Choose all that apply*)
  - Administrator of hospital, health center or organization
  - Administrator of academic training/teaching program (post-graduate, residency, fellowship, etc.)
  - Clinician
  - Clinician, midlevel or advanced practice provider (nurse practitioner, nurse officer, physician assistant, etc.)
  - Director / president / CEO of organization
  - Fellow
  - Nurse
  - Professor / Lecturer
  - Researcher
  - Resident or chief resident
  - Student, Dental
  - Student, Medical
  - Student, Nursing
  - Student, other pre-professional
  - Other (*specify*)
6. If you are a clinician or clinical trainee, what is your specialty? (*Choose all that apply*)
  - a. Dentistry
  - b. Emergency medical services
  - c. Family Medicine
  - d. General practice
  - e. Internal medicine
  - f. Nursing/Nurse Practitioner
  - g. OB/GYN
  - h. Pediatrics
  - i. Physical Therapy
  - j. Physician Assistant
  - k. Surgery
  - l. Other (*specify*)

Lam SK, Winter J, Genderen KV, Lauden SM, Windsor W, Umphrey L. When global becomes virtual: a survey of virtual global health education activities during the COVID-19 pandemic among pediatric educators. *J Grad Med Educ.* 2023;15(1):105-111. DOI: <http://dx.doi.org/10.4300/JGME-D-22-00259.1>

**7. Are you a focal point at your institution for global health education programs?**

(We define a **focal point** as someone who is very familiar with the global health program and/or involved in any leadership role with the global health program, whether you are a faculty or trainee) (*You may proceed with the survey whether you select yes or no*)

- a. Yes
- b. No

**8. If yes, are you responsible for overseeing/teaching global health education activities for any of the following types of trainees? (*Choose all that apply*)**

- a. Fellows
- b. Residents
- c. Medical Students
- d. Nursing Students
- e. Other (*specify*)
- f. N/A – I do not have oversight of trainees
- g. Comments (*free response*)

**9. If known, what specialities are represented within your institution’s global health education programs? (*Choose all that apply*)**

- a. Emergency medical services
- b. Family Medicine
- c. General practice
- d. Internal medicine
- e. Nursing
- f. OB/GYN
- g. Pediatrics
- h. Surgery
- i. Other (*specify*)
- j. I don’t know

**10. Is your institution involved in a *Global Health Partnership* (e.g. a trans- or multinational and/or domestic collaborative health partnership) with another organization or site?**

- a. Yes
- b. No
- c. Don’t know

**11. Think about your institution’s global health education program. If known, approximately how many **total global health trainees** are actively involved in global health education activities at each of the following levels? (*do not include one-time activities that are open attendance*)**

|  |                 |                 |            |          |        |
|--|-----------------|-----------------|------------|----------|--------|
|  | Medical Student | Nursing student | Other pre- | Resident | Fellow |
|--|-----------------|-----------------|------------|----------|--------|

Lam SK, Winter J, Genderen KV, Lauden SM, Windsor W, Umphrey L. When global becomes virtual: a survey of virtual global health education activities during the COVID-19 pandemic among pediatric educators. *J Grad Med Educ.* 2023;15(1):105-111. DOI: <http://dx.doi.org/10.4300/JGME-D-22-00259.1>

|                             |  |  |              |  |  |
|-----------------------------|--|--|--------------|--|--|
|                             |  |  | prof student |  |  |
| 5 or less                   |  |  |              |  |  |
| 6-10                        |  |  |              |  |  |
| 11-20                       |  |  |              |  |  |
| 21 or more                  |  |  |              |  |  |
| Don't know                  |  |  |              |  |  |
| Comments<br>(free response) |  |  |              |  |  |

12. If known, approximately how many **total global health faculty** are actively involved in global health education activities? (May include global health chief resident).

|                          | Medical Student | Nursing Student | Other pre-prof student | Resident | Fellow |
|--------------------------|-----------------|-----------------|------------------------|----------|--------|
| 5 or less                |                 |                 |                        |          |        |
| 6-10                     |                 |                 |                        |          |        |
| 11-20                    |                 |                 |                        |          |        |
| 21 or more               |                 |                 |                        |          |        |
| Don't know               |                 |                 |                        |          |        |
| Comments (free response) |                 |                 |                        |          |        |

13. Do you have a GH administrative support person?

- a. Yes
- b. No
- c. Don't know

14. If yes, does the GH administrative person work for any additional departments and/or programs outside of your global health education program?

- a. Yes
- b. No
- c. Don't know

15. Does your institution provide funding for your GH program?

- a. Yes
- b. No
- c. Don't know

16. Are there restrictions for how the funds are used?

- a. Yes
- b. No
- c. Don't know

Lam SK, Winter J, Genderen KV, Lauden SM, Windsor W, Umphrey L. When global becomes virtual: a survey of virtual global health education activities during the COVID-19 pandemic among pediatric educators. *J Grad Med Educ.* 2023;15(1):105-111. DOI: <http://dx.doi.org/10.4300/JGME-D-22-00259.1>

17. If yes, for what are the funds used? (*check all that apply*)
  - a. Education programs and activities at the home institution (including, but not limited to, one-time events)
  - b. Travel / electives for trainees
  - c. Travel / electives for faculty
  - d. Faculty salary support
  - e. Administrative salary support
  - f. Support for training supplies
  - g. Support for guest speakers (e.g., honoraria)
  - h. Refreshments for global health events
  - i. Funding for research support (e.g., seed grants)
  - j. Other (specify)
  - k. Don't know
  - l. Comments (*free response*)
  
18. Did the COVID-19 pandemic affect the amount of funding for your institution's global health education program?
  - a. Increase funding
  - b. Decrease funding
  - c. No change in funding
  - d. There is no funding for global health education at my institution
  - e. Don't know
  - f. Comments (free response)
  
19. Based on your answer to the previous question, please indicate the percent change to your institution's GH funding on the following scale. (0-100% slide bar)

**Part B. How did the COVID-19 pandemic affect existing global health education activities (GHEAs), including in person or virtual activities**

**OBJECTIVE 2:** To describe global health education activities (GHEA): both in-person and virtual, and both before and after the COVID-19 pandemic began

**OBJECTIVE 3:** To describe ongoing, new and/or planned **virtual** global health education activities (VGHEAs) since the COVID-19 pandemic began

**OBJECTIVE 4:** To determine preferred VGHEAs during the COVID-19 pandemic in the next 6 months

**OBJECTIVE 5:** To evaluate trainee and supervisor experience with and preferences for VGHEAs

20. Of the following examples of global health educational activities (both in-person and virtual), please indicate which activities were in place pre-pandemic; have been implemented since the pandemic began; and will be implemented in the next 6 months. If your institution has no plans to implement an activity, please

Lam SK, Winter J, Genderen KV, Lauden SM, Windsor W, Umphrey L. When global becomes virtual: a survey of virtual global health education activities during the COVID-19 pandemic among pediatric educators. *J Grad Med Educ.* 2023;15(1):105-111. DOI: <http://dx.doi.org/10.4300/JGME-D-22-00259.1>

also indicate which activities you would or would not like to implement at your institution.

You will be prompted to complete each table based on your training level **OR** on the level of trainee(s) that you oversee.

*(Select all that apply in the table)*

Lam SK, Winter J, Genderen KV, Lauden SM, Windsor W, Umphrey L. When global becomes virtual: a survey of virtual global health education activities during the COVID-19 pandemic among pediatric educators. *J Grad Med Educ.* 2023;15(1):105-111. DOI: <http://dx.doi.org/10.4300/JGME-D-22-00259.1>

| <b>TABLE 1 – Global Health (GH) Education Activities</b><br><b>(Repeated per training level or per level(s) of trainees supervised, e.g. 1x/each for: Med Student / Resident / Fellow / Nursing Student / Other pre-professional student)</b> | Ongoing before pandemic | New since pandemic | Plan on implementing in the next 6 months | Interested but no current plan to implement | Not interested in implementing |
|-----------------------------------------------------------------------------------------------------------------------------------------------------------------------------------------------------------------------------------------------|-------------------------|--------------------|-------------------------------------------|---------------------------------------------|--------------------------------|
| <b>Access to Global Health Educational Activities and Materials</b>                                                                                                                                                                           |                         |                    |                                           |                                             |                                |
| Trainees have online access to my institution’s library services (e.g. librarian consults, document searches, interlibrary loans, etc.)                                                                                                       |                         |                    |                                           |                                             |                                |
| Trainees have online access to journals/publications behind paywalls through our library                                                                                                                                                      |                         |                    |                                           |                                             |                                |
| Trainees have access to web-based subscription services (e.g. UpToDate)                                                                                                                                                                       |                         |                    |                                           |                                             |                                |
| Trainees have online access to GH educational materials or curricula created by my institution (simulation cases, etc.)                                                                                                                       |                         |                    |                                           |                                             |                                |
| Trainees have <b>IN PERSON</b> access to GH course lectures, grand rounds, case discussions or journal clubs                                                                                                                                  |                         |                    |                                           |                                             |                                |
| Trainees have <b>VIRTUAL</b> access to GH course lectures, grand rounds, case discussions or journal clubs                                                                                                                                    |                         |                    |                                           |                                             |                                |
| My institution hosts <b>IN PERSON</b> GH conferences, meetings, pre-departure trainings, workshops, or round-table discussions                                                                                                                |                         |                    |                                           |                                             |                                |
| My institution hosts <b>VIRTUAL</b> GH conferences, meetings, pre-departure trainings, workshops, or round-table discussions                                                                                                                  |                         |                    |                                           |                                             |                                |
| <b>Access to Global Health Elective Activities</b>                                                                                                                                                                                            |                         |                    |                                           |                                             |                                |
| Local <b>IN PERSON</b> GH experiences (e.g. engagement during electives, rotations or longer placements with partner organizations <b>within my institution’s catchment area</b> )                                                            |                         |                    |                                           |                                             |                                |
| Local <b>VIRTUAL</b> GH experiences (e.g. engagement during electives, rotations or longer placements with partner organizations <b>within my institution’s catchment area</b> )                                                              |                         |                    |                                           |                                             |                                |

Lam SK, Winter J, Genderen KV, Lauden SM, Windsor W, Umphrey L. When global becomes virtual: a survey of virtual global health education activities during the COVID-19 pandemic among pediatric educators. *J Grad Med Educ.* 2023;15(1):105-111. DOI: <http://dx.doi.org/10.4300/JGME-D-22-00259.1>

|                                                                                                                                                                                                                       |  |  |  |  |  |
|-----------------------------------------------------------------------------------------------------------------------------------------------------------------------------------------------------------------------|--|--|--|--|--|
| Domestic <b>IN PERSON</b> GH experiences (e.g. engagement during electives, rotations or longer placements with partner organizations <b>outside of my institution's catchment area but within the same country</b> ) |  |  |  |  |  |
| Domestic <b>Virtual</b> PGH experiences (e.g. engagement during electives, rotations or longer placements with partner organizations <b>outside of my institution's catchment area but within the same country</b> )  |  |  |  |  |  |
| International <b>IN PERSON</b> GH experiences (e.g. engagement during electives, rotations or longer placements with partner organizations <b>outside of my institution's home country</b> )                          |  |  |  |  |  |
| International <b>IN PERSON</b> GH experiences (e.g. engagement during electives, rotations or longer placements with partner organizations <b>outside of my institution's home country</b> )                          |  |  |  |  |  |
| My institution hosts trainees from outside my institution <b>IN PERSON</b>                                                                                                                                            |  |  |  |  |  |
| My institution hosts trainees from outside my institution <b>VIRTUALLY</b>                                                                                                                                            |  |  |  |  |  |
| <b>IN PERSON</b> participation in local public health or community outreach initiatives                                                                                                                               |  |  |  |  |  |
| <b>VIRTUAL</b> participation in local public health or community outreach initiatives                                                                                                                                 |  |  |  |  |  |
| <a href="#">Access to Global Health Certification and Mentorship</a>                                                                                                                                                  |  |  |  |  |  |
| Trainees have a global health mentor for career development, scholarly activities, etc.                                                                                                                               |  |  |  |  |  |
| My institution offers a GH pathway/track/certificate program for trainees                                                                                                                                             |  |  |  |  |  |
| My institution conducts an <b>IN-PERSON</b> GH career day                                                                                                                                                             |  |  |  |  |  |
| My institution conducts a <b>VIRTUAL</b> GH career day                                                                                                                                                                |  |  |  |  |  |

Comments (*free response*)



Lam SK, Winter J, Genderen KV, Lauden SM, Windsor W, Umphrey L. When global becomes virtual: a survey of virtual global health education activities during the COVID-19 pandemic among pediatric educators. *J Grad Med Educ.* 2023;15(1):105-111. DOI: <http://dx.doi.org/10.4300/JGME-D-22-00259.1>

**Table 2**

21. Of the following examples of global health educational activities **within a global health partnership** (both in-person and virtual), please indicate which activities were in place pre-pandemic; have been implemented since the pandemic began; and will be implemented in the next 6 months. If your institution has no plans to implement an activity, please also indicate which activities you would or would not like to implement at your institution.

*(Select all that apply)*

| <b>TABLE 2 Global Health (GH) Education Activities of GH Partners</b>                                                                                     | Ongoing before pandemic | New since pandemic | Plan on implementing in the next 6 months | Interested but no current plan to implement | Not interested in implementing |
|-----------------------------------------------------------------------------------------------------------------------------------------------------------|-------------------------|--------------------|-------------------------------------------|---------------------------------------------|--------------------------------|
| <b>Access to Global Health Education Activities and Materials</b>                                                                                         |                         |                    |                                           |                                             |                                |
| Trainees <b>from my GH partner institution(s)</b> have online access to my institution’s library services (e.g. textbook access, document searches, etc.) |                         |                    |                                           |                                             |                                |
| Trainees <b>from my GH partner institution(s)</b> have online access to journals publications behind paywalls through our library                         |                         |                    |                                           |                                             |                                |
| Trainees <b>at my GH partner institution(s)</b> have access to web-based subscription services (e.g. UpToDate)                                            |                         |                    |                                           |                                             |                                |
| Trainees <b>at my GH partner institution(s)</b> have online access to educational materials created by my institution (e.g. recordings of lectures)       |                         |                    |                                           |                                             |                                |
| Trainees <b>at my GH partner institution(s)</b> have access to GH educational materials or curricula created by my institution (simulation cases, etc.)   |                         |                    |                                           |                                             |                                |
| Trainees <b>at my GH partner institution(s)</b> have access to GH course lectures or grand rounds or case discussions                                     |                         |                    |                                           |                                             |                                |
| My institution hosts GH conferences, meetings, pre-departure trainings, workshops, or round-table discussions for <b>my GH partner institution(s)</b>     |                         |                    |                                           |                                             |                                |
| Trainees or faculty <b>at my institution’s GH partner site(s)</b> create curricula or educational materials for my institution                            |                         |                    |                                           |                                             |                                |

Lam SK, Winter J, Genderen KV, Lauden SM, Windsor W, Umphrey L. When global becomes virtual: a survey of virtual global health education activities during the COVID-19 pandemic among pediatric educators. *J Grad Med Educ.* 2023;15(1):105-111. DOI: <http://dx.doi.org/10.4300/JGME-D-22-00259.1>

|                                                                                                                                                                          |  |  |  |  |  |
|--------------------------------------------------------------------------------------------------------------------------------------------------------------------------|--|--|--|--|--|
| Trainees or faculty at <b>my institution's GH partner site(s)</b> create GH simulation cases for use by either partner                                                   |  |  |  |  |  |
| <b>Face to Face Partnership Educational Activities</b>                                                                                                                   |  |  |  |  |  |
| Joint virtual journal clubs between my institution and our GH partner(s)                                                                                                 |  |  |  |  |  |
| Joint virtual didactic medical education sessions, trainee audience: <b>trainees from my institution's GH partner site(s)</b> prepare/deliver a joint education session  |  |  |  |  |  |
| Joint virtual Grand Rounds, faculty and/or trainee audience                                                                                                              |  |  |  |  |  |
| Joint virtual case discussions: faculty or trainees at <b>my institution's GH partner site(s)</b> prepare/deliver a joint case discussion                                |  |  |  |  |  |
| Virtual GH simulation cases for <b>my institution's GH partner site's</b> trainees and or faculty                                                                        |  |  |  |  |  |
| <b>Global Health Clinical Care Activities with GH Partners</b>                                                                                                           |  |  |  |  |  |
| Virtual ward rounding – trainees/faculty from partner sites attend each other's clinical rounds by video conference (e.g. Zoom, FaceTime, WhatsApp, Skype, etc.)         |  |  |  |  |  |
| Virtual laboratory rounds - trainees/faculty from partner sites attend each other's microbiology rounds by video conference (e.g. Zoom, FaceTime, WhatsApp, Skype, etc.) |  |  |  |  |  |
| Virtual specialist case referrals – specialists at both sites complete virtual consults on partner cases                                                                 |  |  |  |  |  |
| Trainees or faculty at <b>my institution's GH partner site(s)</b> have access to telemedicine platforms hosted by my institution                                         |  |  |  |  |  |
| Participation in local public health or community outreach initiatives                                                                                                   |  |  |  |  |  |
| <b>Collaborative Global Health Scholarly Activities</b>                                                                                                                  |  |  |  |  |  |
| Mutually identifying knowledge or practice gaps – trainees paired with faculty mentors at either location to virtually collaborate                                       |  |  |  |  |  |
| Collaborative trainee scholarly projects – matching trainees from each GH partner site to facilitate completion of required trainee project(s) (e.g. for                 |  |  |  |  |  |

Lam SK, Winter J, Genderen KV, Lauden SM, Windsor W, Umphrey L. When global becomes virtual: a survey of virtual global health education activities during the COVID-19 pandemic among pediatric educators. *J Grad Med Educ.* 2023;15(1):105-111. DOI: <http://dx.doi.org/10.4300/JGME-D-22-00259.1>

|                                                                                                                                                       |  |  |  |  |  |
|-------------------------------------------------------------------------------------------------------------------------------------------------------|--|--|--|--|--|
| collaborative literature reviews, contacting specialists, fill knowledge gaps, etc.)                                                                  |  |  |  |  |  |
| Joint research opportunities (e.g. Literature reviews, project proposals, IRB submissions, etc.)                                                      |  |  |  |  |  |
| Joint abstracts, presentations, and/or manuscript opportunities                                                                                       |  |  |  |  |  |
| Trainees or faculty <b>at my institution's GH partner(s) site(s)</b> may apply for research/project funding through my institution                    |  |  |  |  |  |
| Trainees or faculty <b>from my institution's GH partner site(s)</b> can virtually access support from my organization's ethical review board services |  |  |  |  |  |

Lam SK, Winter J, Genderen KV, Lauden SM, Windsor W, Umphrey L. When global becomes virtual: a survey of virtual global health education activities during the COVID-19 pandemic among pediatric educators. *J Grad Med Educ.* 2023;15(1):105-111. DOI: <http://dx.doi.org/10.4300/JGME-D-22-00259.1>

**Part C. Benefits, Barriers and Challenges to virtual global health education activities (VGHEAs) during COVID-19.**

**OBJECTIVE 6:** To determine the perceived benefits and barriers/challenges of VGHEAs  
**OBJECTIVE 7:** To identify geographic differences in preferred VGHEAs

**22.** In your opinion, what are the **benefits** of virtual global health education activities (either from your own experience or from what you imagine could be a benefit). *(Choose all that apply).*

- a. Virtual GH education initiatives would be complementary to existing GH activities at my organization.
- b. Lay a foundation for virtual GH education activities in place even after in-person activities resume
- c. Access to resources
- d. Access to clinical opportunities
- e. Access to professional support/mentorship
- f. Maintaining GH partnerships during the pandemic
- g. Improving technical capacity / understanding of virtual initiatives within the institution
- h. Reaching more trainees than otherwise available
- i. Allow educational endeavors to be safer amidst the COVID-19 pandemic
- j. Allows for career advancement despite pandemic-related restrictions
- k. Allow for less-costly GH education activities to continue
- l. Other
- m. Comments\_\_\_\_\_

**23.** In your opinion, what are the **barriers and challenges** of virtual global health education activities (either from your own experience or from what you imagine could be a barrier or challenge). *(Choose all that apply).*

- a. Cost of training faculty/staff/trainees in virtual partnership initiatives
- b. Time needed to train faculty/staff/trainees in virtual partnership initiatives
- c. Lack of space/facilities that could be dedicated to virtual partnership initiatives (e.g. conference rooms, simulation centers)
- d. Lack of institutional support (financial, policy, etc.) for virtual partnership initiatives
- e. Lack of equipment to be used in virtual education, such as for simulation exercises
- f. Lack of formal training curriculum for virtual partnership initiatives
- g. Lack of mentors/local champions for virtual partnership initiatives at my site
- h. Lack of consistent/reliable internet access to support virtual partnership initiatives

Lam SK, Winter J, Genderen KV, Lauden SM, Windsor W, Umphrey L. When global becomes virtual: a survey of virtual global health education activities during the COVID-19 pandemic among pediatric educators. *J Grad Med Educ.* 2023;15(1):105-111. DOI: <http://dx.doi.org/10.4300/JGME-D-22-00259.1>

- i. Other
- j. Comments \_\_\_\_\_

24. Do you anticipate either continuing your institution's virtual global health education activities or implementing new ones after the pandemic ends?
- a. Yes
  - b. No
  - c. Undecided

25. Other comments about virtual GHEAs? \_\_\_\_\_

26. May we contact you in the future for additional study participation?
- a. Yes
  - b. No

Preferred email address \_\_\_\_\_

Lam SK, Winter J, Genderen KV, Lauden SM, Windsor W, Umphrey L. When global becomes virtual: a survey of virtual global health education activities during the COVID-19 pandemic among pediatric educators. *J Grad Med Educ.* 2023;15(1):105-111. DOI: <http://dx.doi.org/10.4300/JGME-D-22-00259.1>

Lam SK, Winter J, Genderen KV, Lauden SM, Windsor W, Umphrey L. When global becomes virtual: a survey of virtual global health education activities during the COVID-19 pandemic among pediatric educators. *J Grad Med Educ.* 2023;15(1):105-111. DOI: <http://dx.doi.org/10.4300/JGME-D-22-00259.1>

Figure 1A-B. Greatest perceived benefit and challenge for virtual global health education activities among respondents (N=28)

### 1A. Greatest Perceived Benefit

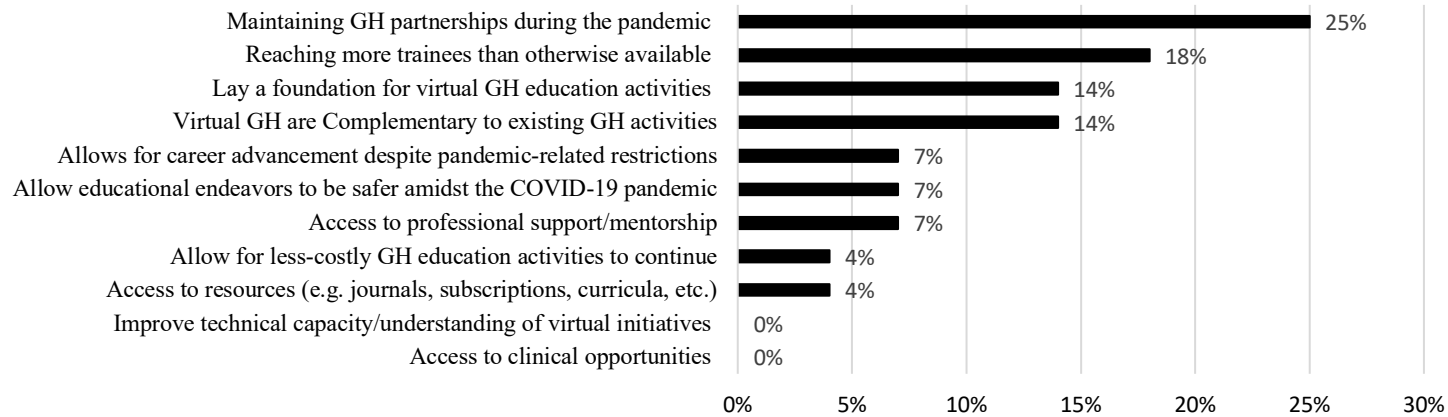

### 1B. Greatest Perceived Challenge

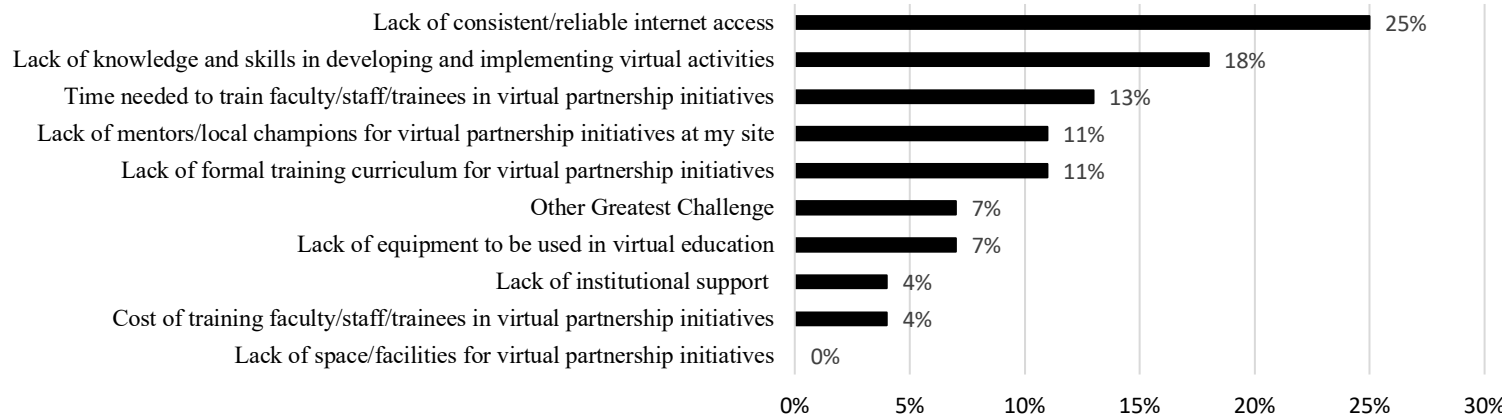

Supplement: JGMED22002591.pdf [file JGMED22002591.pdf]
